# Supplementary material for: Rational and wide-range tuning of CNT aerogel conductors with multifunctionalities
Source: Royal Society of Chemistry journal article supplement (doi:10.1039/d0nr03564e), 2020-01-01
Supplement: d0nr03564e1.pdf [file d0nr03564e1.pdf]

# Rational and Wide-range Tuning of CNT Aerogel Conductors with Multifunctionalities

Min Li,<sup>‡a</sup> Qian Gong,<sup>‡b</sup> Pei Cao,<sup>b</sup> Han Wang,<sup>\*c</sup> Jian Qiao,<sup>a,b</sup> Yingying Yu,<sup>b</sup> Weibang Lu,<sup>b</sup> Jiangtao Di,<sup>b</sup> Zuoguang Zhang,<sup>a</sup> Lianxi Zheng,<sup>\*d</sup> and Qingwen Li,<sup>\*b</sup>

<sup>a</sup> Key Laboratory of Aerospace Advanced Materials and Performance (Ministry of Education), School of Materials Science and Engineering, Beihang University, Beijing 100191, China

<sup>b</sup> Advanced Materials Division, Suzhou Institute of Nano-Tech and Nano-Bionics, Chinese Academy of Sciences, Suzhou 215123, China. Email: qwli2007@sinano.ac.cn

<sup>c</sup> State Key Laboratory of Fluid Power and Mechatronic System, School of Mechanical Engineering, Zhejiang University, Hangzhou 310027, China. Email: wanghan3327@sina.com

<sup>d</sup> Department of Mechanical Engineering, Khalifa University, Abu Dhabi 127788, United Arab Emirates. Email: lianxi.zheng@kustar.ac.ae

<sup>‡</sup>These authors contributed equally

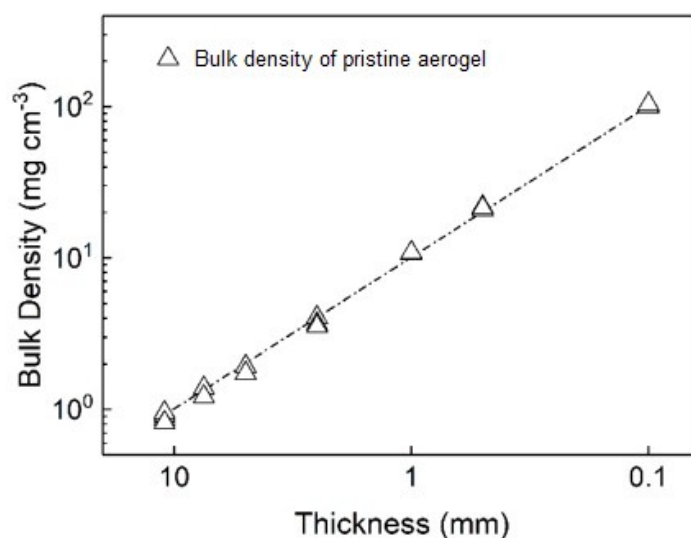

Fig. S1. The bulk density of pristine aerogel.

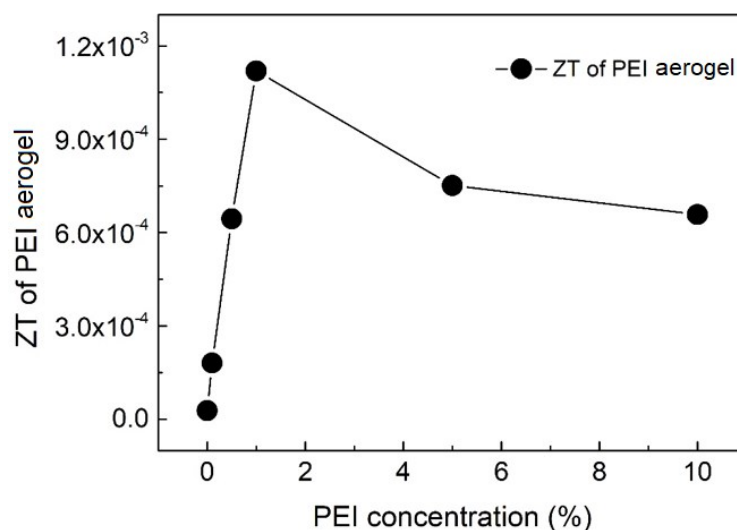

Fig. S2. Figure of merit (ZT) of the n-type aerogel coated with different PEI concentration.

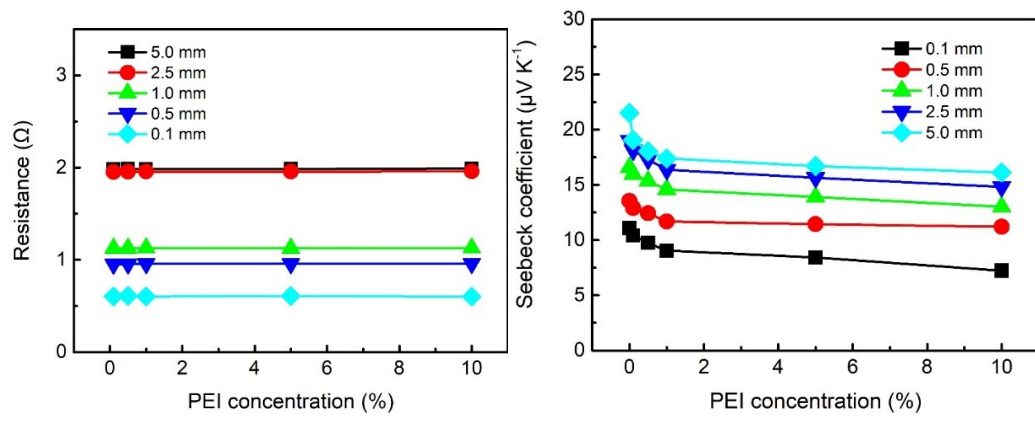

**Fig. S3.** Resistance and Seebeck coefficients of the CNT aerogel conductor with different PEI concentrations.

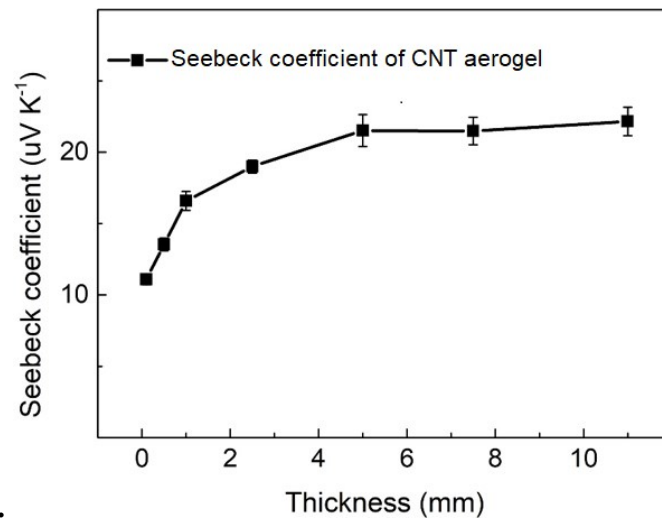

**Fig. S4.** Seebeck coefficient of the CNT aerogel conductor.

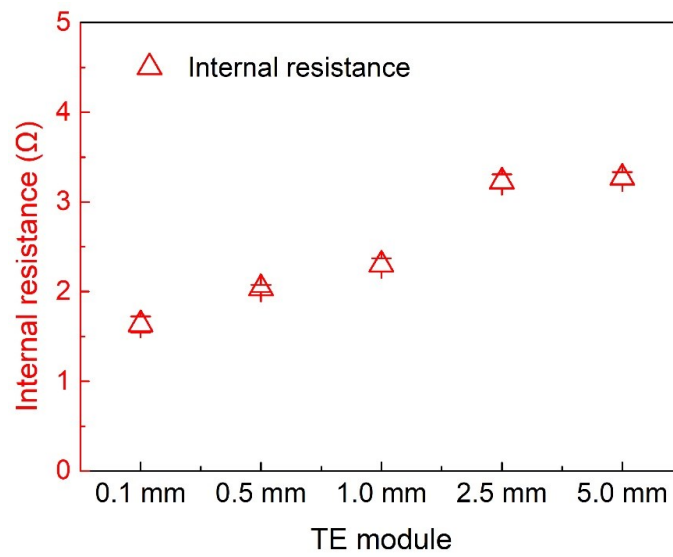

**Fig. S5.** The internal resistance of different TE modules.

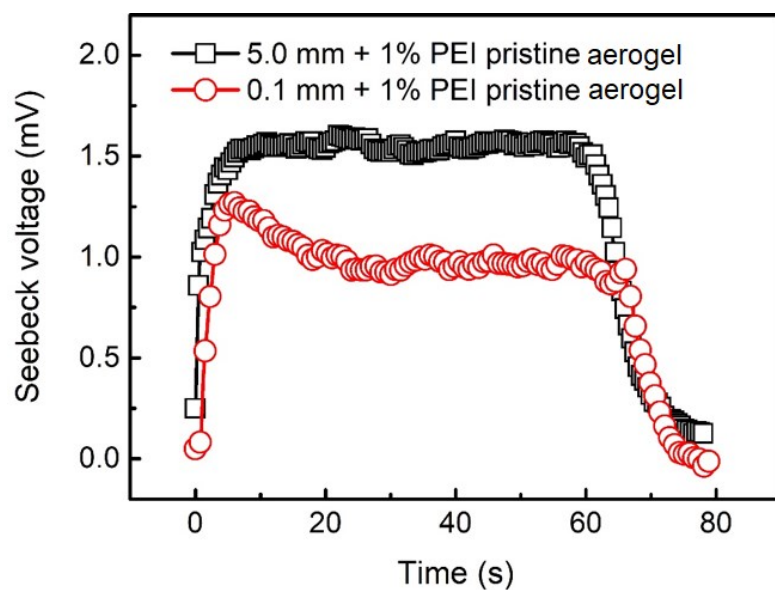

**Fig. S6.** The TE output Seebeck voltages changing according to time. (The temperature difference was removed after 60 sec)

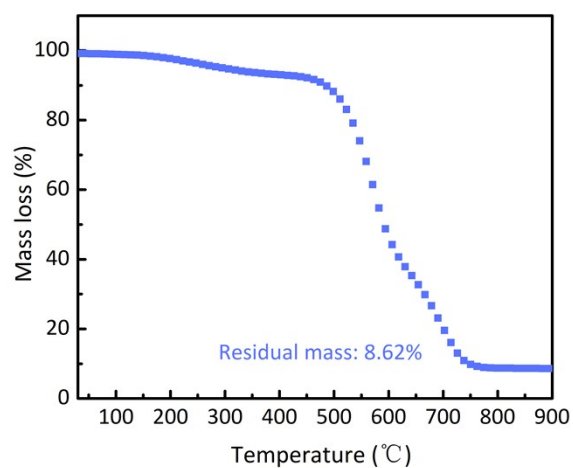

**Fig. S7** Thermogravimetry(TG) curve of pristine CNT aerogel

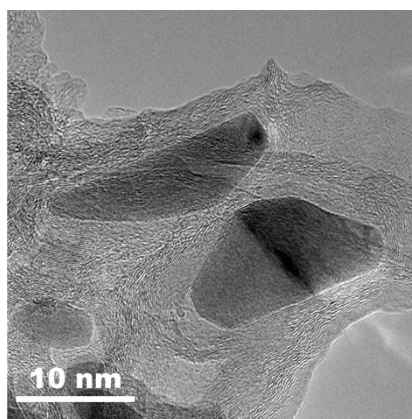

**Fig.S8** The amorphous carbon around the catalyst changes to graphite phase
